# Supplementary material for: 20-HETE promotes glucose-stimulated insulin secretion in an autocrine manner through FFAR1
Source: Springer Nature journal article supplement (doi:10.1038/s41467-017-02539-4), 2018-01-08
Supplement: MOESM1 [file 41467_2017_2539_MOESM1_ESM.pdf]

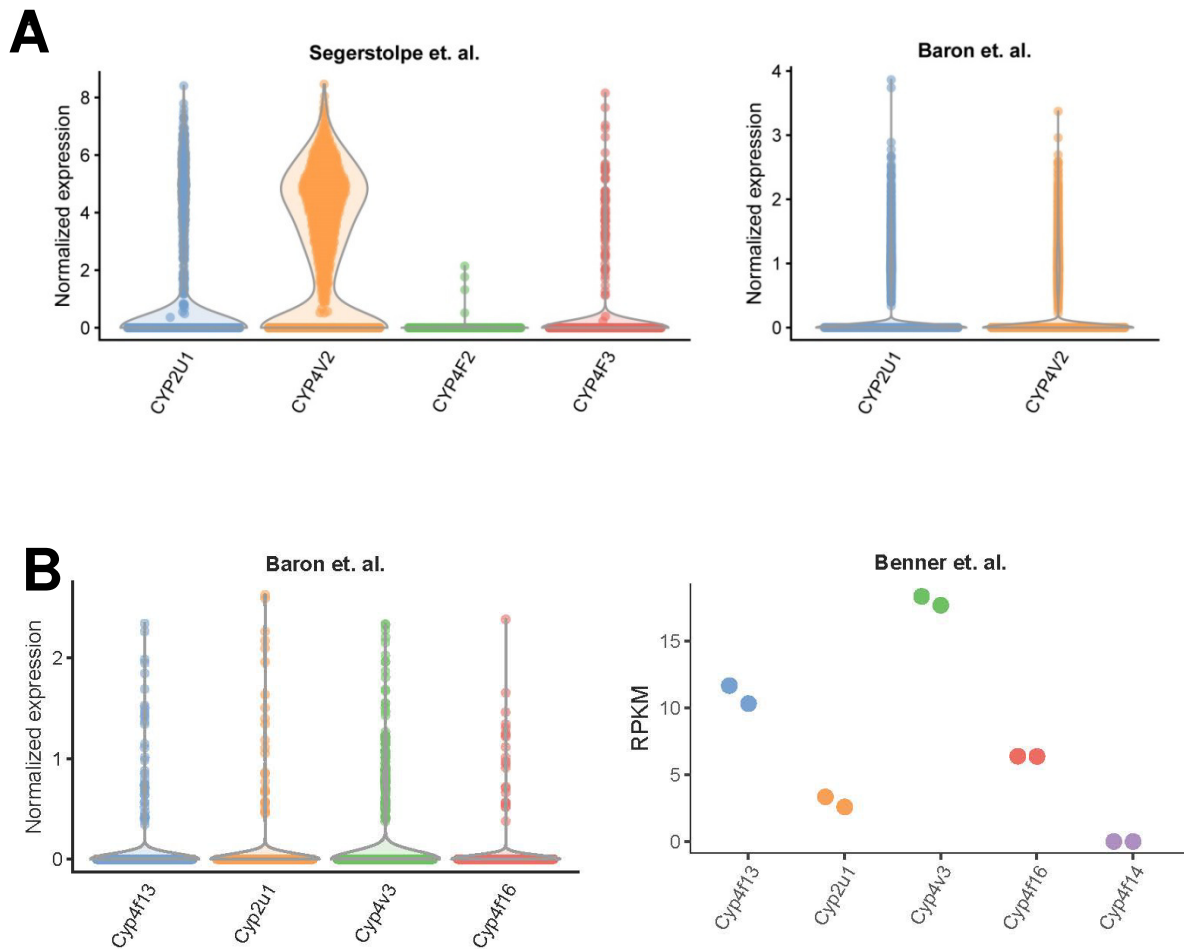

**Supplementary Figure 1. Expression of 20-HETE producing CYP450  $\omega$ -hydroxylases in human and mouse  $\beta$ -cells.** (A) Human  $\beta$ -cell single cell expression of selected genes encoding 20-HETE producing CYP450  $\omega$ -hydroxylases from Segerstolpe et al. (2016) and Baron et al. (2016). Genes are only shown if expression was detected in at least one cell. (B) Expression of selected genes from single mouse  $\beta$ -cells (Baron et al., 2016) or bulk sorted  $\beta$ -cells (Benner et al., 2014). Genes are only shown if expression was detected in at least one cell for data from Baron et al. (2016). Data from Benner et al. (2014) were taken from additional file 12 and were not processed further.

**Methods:** Raw count data were downloaded from GEO and ArrayExpress (Accession numbers GSE84133 and E-MTAB-5061, respectively). We created three data objects in R using the SingleCellExperiment function from the *scater* package (version 1.5.16) for mouse and human donors from Baron et al. (2016) and for human donors from Segerstolpe et al. (2016). All data objects were subjected to a gene-filtering step to only retain genes that were detected in at least 4 cells. Expression was then normalized using the computeSumFactors method from the *scrna* package using deconvolution within donors.

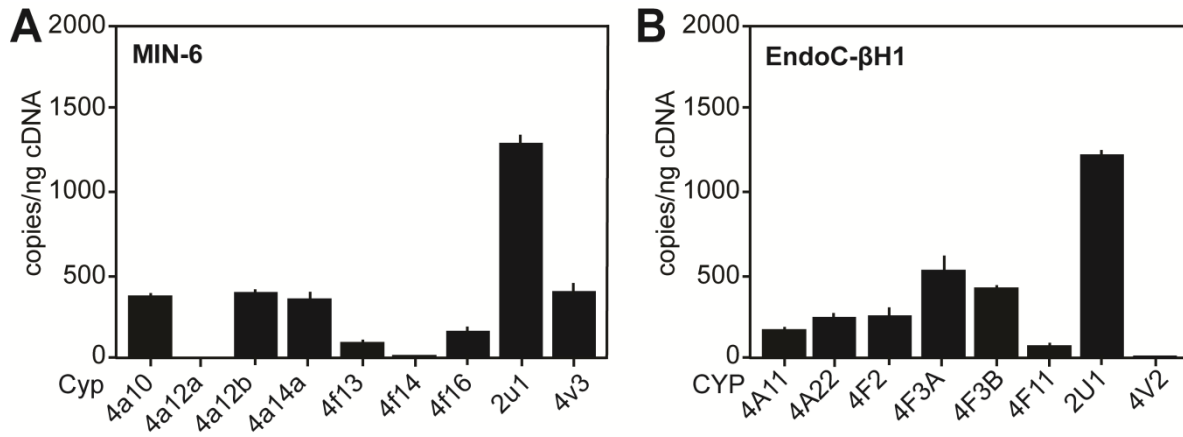

**Supplementary Figure 2. Expression of various 20-HETE producing CYP450  $\omega$ -hydroxylases in MIN-6 and EndoC- $\beta$ H1 cells.** (A, B) Expression of CYP450  $\omega$ -hydroxylases involved in 20-HETE synthesis MIN-6 (A) and in EndoC- $\beta$ H1 cells (B). Shown are mean values  $\pm$  s.e.m..

## Supplementary Table

**Table 1. Primers used for quantitative RT-PCR**

| Gene target  | Sense primer             | Antisense primer        |
|--------------|--------------------------|-------------------------|
| <b>mouse</b> |                          |                         |
| Cyp4a10      | gttccagcacaggaggatg      | cagccgttcccatttgc       |
| Cyp4a12a     | atccttctcgattgcacca      | caaactgtttccaatgcag     |
| Cyp4a12b     | acggaaatcatggcagactc     | tcatcaaggtgatgtgttga    |
| Cyp4a14a     | gccattctcaggaggatcaa     | tctggcagcaattcaaagc     |
| Cyp4f13      | ctcctgatgagtgctggatga    | ttcaggatgtcaaagtgaag    |
| Cyp4f14      | tctggttattcccctcacca     | ttgggtgaagagggtacaggagt |
| Cyp4f16      | cgatagggaggcaccataga     | gtgggaggttacatgccagt    |
| Cyp2u1       | gcttcgtcatttcggctctg     | acgtatgcaaactcctcgat    |
| Cyp4v3       | ttccatggcctagcaattag     | cttggatgctgattcatgg     |
| Ffar1        | aggcgctctctcacactc       | ctagccacattggaggcatt    |
| <b>human</b> |                          |                         |
| CYP4A11      | gtgctgcaccatgagtgctct    | ccagagacatcaccaggga     |
| CYP4A22      | tgcaccatgagtgctctctg     | agggaggtcacttggaggat    |
| CYP4F2       | cattgcaccaaaggacaagtt    | caccagcactcagcaggag     |
| CYP4F3A      | tgcagaaatgtgtcttcagctt   | ggcggcaatatattactgg     |
| CYP4F3B      | cgctctgcctctctccact      | ggtggtgagtgaggctctg     |
| CYP4F11      | ccctgttgacttcttaatctcttc | aaggccagagtaaccgagtg    |
| CYP2U1       | cctcatgctggagttgtgtg     | gcacaacatcctcacctcaa    |
| CYP4V2       | ggcctccagtgcaatcac       | aaagcgaagaccggaaaac     |
| FFAR1        | gtgtcacctgggtctgtgtct    | ccagggaggtgtgtgtgt      |
